1 **Nanopore sequencing significantly improves genome assembly of the eukaryotic protozoan**  
2 **parasite *Trypanosoma cruzi***

3  
4 Running title: Nanopore improves *T. cruzi* genome assembly

5  
6 Florencia Díaz-Viraqué<sup>1</sup>, Sebastian Pita<sup>1,2</sup>, Gonzalo Greif<sup>1</sup>, Rita de Cássia Moreira de Souza<sup>3</sup>, Gregorio  
7 Iraola<sup>4,5,6,#</sup>, Carlos Robello<sup>6,7,#</sup>

8  
9 <sup>1</sup>Laboratorio de Interacciones Hospedero-Patógeno, Institut Pasteur de Montevideo, Montevideo,  
10 Uruguay.

11 <sup>2</sup>Sección Genética Evolutiva, Facultad de Ciencias, Universidad de la República, Montevideo,  
12 Uruguay.

13 <sup>3</sup>Grupo de Pesquisa Triatomíneos, Instituto René Rachou-FIOCRUZ, Belo Horizonte, Brazil.

14 <sup>4</sup>Laboratorio de Genómica Microbiana, Institut Pasteur Montevideo, Montevideo, Uruguay.

15 <sup>5</sup>Unidad de Bioinformática, Institut Pasteur Montevideo, Montevideo, Uruguay.

16 <sup>6</sup>Centro de Biología Integrativa, Universidad Mayor, Santiago de Chile, Chile.

17 <sup>7</sup>Departamento de Bioquímica, Facultad de Medicina, Universidad de la República, Montevideo,  
18 Uruguay.

19  
20 # Author for Correspondence:

21  
22 Carlos Robello, Laboratorio de Interacciones Hospedero-Patógeno, Institut Pasteur de Montevideo,  
23 Uruguay, Tel: +(598) 2522 09 10, Fax: +(598) 2522 41 85, E-mail: [robello@pasteur.edu.uy](mailto:robello@pasteur.edu.uy).

24  
25 Gregorio Iraola, Laboratorio de Genómica Microbiana, Institut Pasteur de Montevideo, Uruguay, Tel:  
26 +(598) 2522 09 10, Fax: +(598) 2522 41 85, E-mail: [giraola@pasteur.edu.uy](mailto:giraola@pasteur.edu.uy).

27  
28 **Key words:** *Trypanosoma cruzi*; Hybrid assembly; protozoan parasites; Chagas disease; Oxford  
29 Nanopore Technologies

30  
31  
32

33 **Abstract.** Chagas disease was described by Carlos Chagas, who first identified the parasite  
34 *Trypanosoma cruzi* from a two-year-old girl called Berenice. Many *T. cruzi* sequencing projects based  
35 on short reads have demonstrated that genome assembly and downstream comparative analyses are  
36 extremely challenging in this species, given that half of its genome is composed of repetitive  
37 sequences. Here, we report *de novo* assemblies, annotation and comparative analyses of the Berenice  
38 strain using a combination of Illumina short reads and MinION long reads. Our work demonstrates that  
39 Nanopore sequencing improves *T. cruzi* assembly contiguity and increases the assembly size in ~16  
40 Mb. Specifically, we found that assembly improvement also refines the completeness of coding regions  
41 for both single copy genes and repetitive transposable elements. Beyond its historical and  
42 epidemiological importance, Berenice constitutes a fundamental resource since it now represents the  
43 best-quality assembly available for TcII, a highly prevalent lineage causing human infections in South  
44 America. The availability of Berenice genome expands the known genetic diversity of *T. cruzi* and  
45 facilitates more comprehensive evolutionary inferences. Our work represents the first report of  
46 Nanopore technology used to resolve complex protozoan genomes, supporting its subsequent  
47 application for improving trypanosomatid and other highly repetitive genomes.

## 48 **Introduction**

49

50 The MinION (Oxford Nanopore Technologies) is an instrument that fits in the palm of a hand and  
51 can be plugged in a laptop computer allowing single-molecule, real-time DNA sequencing with  
52 unprecedented speed and portability. Since this instrument directly reads individual DNA fragments  
53 without the need for amplification steps during library preparation, it has the capacity of producing  
54 very long reads. The availability of this kind of sequencing data is relevant when assembling genomes  
55 that are rich in repetitive elements, because long reads allow to span entire tandems of repeats and  
56 anchor them to uniquely occurring segments of the genome, resolving these complex regions and  
57 improving contiguity. However, the still high error rates of MinION demands considerable amounts of  
58 data and intensive computation to build entire genomes just using long reads. Conversely, hybrid  
59 strategies that combine error-prone long reads with much more accurate Illumina short reads represent  
60 a more convenient approach for enhancing genome completeness. Indeed, several organisms ranging  
61 from bacteria (Wick et al. 2017) to vertebrates (Tan et al. 2018) have been recently sequenced using a  
62 combination of Nanopore and Illumina reads. However, this strategy has not been implemented so far  
63 to resolve protozoan genomes.

64 *Trypanosoma cruzi* is a protozoan parasite belonging to the order *Kinetoplastida* that causes  
65 Chagas disease (CD), also known as American Trypanosomiasis, a neglected parasitic disease that  
66 affects 6-7 million people worldwide and is transmitted to humans and animals mainly by Triatomine  
67 insect vectors (Deane 1964; WHO, 2017). CD recently emerged in non-endemic regions such as  
68 Western Europe, Australia, Japan, Canada and the United States due to widespread immigration,  
69 however its highest incidence is observed in Latin American countries where the parasite is endemic  
70 (Rassi et al. 2010). Indeed, CD was first diagnosed in Brazil more than one century ago by Carlos  
71 Chagas when he examined the two year old girl Berenice Soares (Chagas 1909), who developed the  
72 asymptomatic form of the disease (de Lana et al. 1996). The archetypal *T. cruzi* strain originally  
73 isolated from this case (Salgado et al. 1962) represents the oldest known record for this pathogenic  
74 parasite, and own invaluable historical, cultural and epidemiological importance. The Berenice strain  
75 has been characterized in many aspects, but has not been whole-genome sequenced by any technology  
76 so far.

77 Here, we report the whole-genome sequence, annotation and comparative analysis of the Berenice  
78 strain isolated by Salgado et al. (1962) using a combination of Illumina short reads and MinION long  
79 reads, providing a useful genetic resource for the community working with parasite genomes.  
80 Importantly, we demonstrate that a single MinION run based on a straightforward 10-minute library

81 preparation protocol allows a 67-fold increase in genome contiguity and improves genome  
82 completeness by 28% when compared with short-read-only assemblies. Our results show that hybrid  
83 assembly strategies using MinION are effective when dealing with complex protozoan genomes like *T.*  
84 *cruzi*.

85

## 86 **Results**

87

88 **Nanopore sequencing improves *T. cruzi* assembly contiguity and size.** We whole-genome sequenced  
89 *T. cruzi* strain Berenice using Illumina 150 bp pair-end short reads and Nanopore 1D long reads (Table  
90 1). Then, we produced two genome assemblies, one just using the short reads from Illumina  
91 (hereinafter referred as the Illumina assembly) and the other by combining Illumina short reads with  
92 Nanopore long reads (hereinafter referred as the hybrid assembly). Figure 1A shows a 46-fold  
93 improvement in median scaffold size in the hybrid assembly. This improvement is also evident by a 51-  
94 fold decrease in scaffold number (from ~47,000 scaffolds with a maximum length of ~26 Kb in the  
95 Illumina assembly to ~900 scaffolds with a maximum length of ~1 Mb in the hybrid assembly), and a  
96 ~16 Mb increase in assembly size product of improved resolution of repeated regions (Table 1). Also,  
97 the cumulative hybrid assembly size is kept practically unchanged around ~40 Mb when considering  
98 scaffolds of increasing size, evidencing insignificant contribution of small scaffolds to the whole  
99 assembly. On the contrary, the cumulative size of the Illumina assembly rapidly tends to zero when  
100 considering longer scaffolds evidencing an extremely fragmented assembly (Fig. 1B).

101 **Nanopore reads close Illumina assembly gaps.** To evaluate the contribution of Illumina and  
102 Nanopore data to close gaps, we separately aligned both types of reads to the hybrid assembly. The  
103 longest region where the coverage is zero (no read alignment in at least 6 consecutive positions)  
104 spanned 6,156 bp with Illumina reads while it decreased to 1,787 bp with Nanopore reads.  
105 Additionally, assembly regions of coverage zero were much more abundant when aligning Illumina  
106 reads (n=3624) than when aligning Nanopore reads (n=54) (Fig. 1C). One of these regions is  
107 represented in Fig. 1D, where Nanopore reads uninterruptedly cover this genomic segment with a  
108 smooth depth of ~20x while Illumina reads fail to resolve an intrinsic region where coverage falls to  
109 zero, causing the break of contiguity in the assembly.

110 **Nanopore reads improve completeness of coding regions.** To assess whether assembly improvement  
111 also refines the completeness of coding regions, we first annotated protein-coding genes and non-  
112 coding RNA genes. We obtained a 3-fold increase in the recovery of protein-coding genes, non-coding  
113 RNA genes and transposable elements from the hybrid assembly in comparison with the Illumina

114 assembly (Table 1). Additionally, we tested completeness by attempting the recovery of conserved  
115 single-copy genes from both assemblies. Out of a database containing more than 215 single-copy  
116 protozoan orthologs, ~57% were fully recovered from the hybrid assembly while only ~29% were  
117 recovered from the Illumina assembly. Also, when using a more general database containing over 303  
118 single-copy orthologs conserved across eukaryotic organisms, 68% of these genes were recovered from  
119 the hybrid assembly while 48.5% from the Illumina assembly. Together, this demonstrates that  
120 Nanopore sequencing helps to mitigate the underestimation of both unique and repetitive coding  
121 regions of the genome.

122  
123 **Berenice belongs to TcII and is phylogenetically close to Esmeraldo.** *T. cruzi* strains are traditionally  
124 classified in discrete typing units (DTUs) TcI-TcVI based on molecular and phylogenetic analyses.  
125 Based on this, Berenice belongs to TcII (Zingales et al. 2009). To test this, we performed a  
126 phylogenetic analysis including several available *T. cruzi* genomes and Berenice using L1Tc sequences,  
127 previously defines as an accurate molecular clock (Berná et al., 2018). The resulting tree showed three  
128 major lineages (Fig. 2), one comprising sequences from Dm28c and Silvio that defined TcI, other  
129 conformed mainly of sequences from TCC and Non-Esmeraldo that defined TcIII, and the remaining  
130 composed by Berenice, TCC and Esmeraldo, confirming that Berenice belongs to TcII.

## 131 132 **Discussion**

133  
134 *Trypanosoma cruzi* is the causative agent of Chagas disease, an important neglected tropical  
135 disease that affects about 6-7 million people worldwide (WHO, 2017). Here, we report the complete  
136 genome sequence of Berenice, the first *T. cruzi* strain isolated from a patient (Chagas 1909). This  
137 represents the first trypanosomatid parasite genome generated using a hybrid assembly strategy by  
138 combining Illumina short reads and Nanopore long reads.

139 Even though trypanosomatid genomes are small, their assembly and annotation have been  
140 challenging due to the abundance of repetitive sequences including the 195bp satellite, tandem repeats,  
141 and multigene families (El-Sayed et al. 2005a; Berná et al. 2018; Pita et al. 2018). In fact, when  
142 "tritryp" genomes were sequenced in 2005, *T. cruzi* genome assembly remained highly fragmented (El-  
143 Sayed et al. 2005b), hampering highly precise comparative genomics. However, the recent advent of  
144 long-read sequencing technologies such as PacBio and Oxford Nanopore is allowing us to overcome  
145 these limitations.

146 Long-read sequencing using PacBio has been proven useful to improve the quality of *T. cruzi*  
147 genome assemblies (Berná et al. 2018; Callejas-Hernández et al. 2018), however, the innovative  
148 Nanopore technology has been not implemented to sequence trypanosomatid genomes so far despite  
149 presenting several comparative advantages over PacBio. Nanopore is cheaper, easy to use in any  
150 laboratory, requires less amount of genomic DNA and sequencing yield can be monitored in real-time.  
151 Additionally, Nanopore offers countless possibilities for library preparation including quick,  
152 straightforward protocols. Indeed, here we show that a 10-minute library preparation protocol followed  
153 by 12 hours of Nanopore 1D sequencing significantly improves assembly contiguity and annotation,  
154 demonstrating the usefulness of this technology to resolve highly complex parasite genomes.

155 Beyond its historical, cultural and epidemiological relevance for being an isolate from the first  
156 clinical case of Chagas disease, Berenice strain was chosen in order to increase the phylogenetic  
157 representativeness of genomes resolved by long-read sequencing. To date, three *T. cruzi* strains have  
158 been assembled with long reads: strain Dm28c belonging to TcI, strain Bug2148 belonging to TcV and  
159 strain TCC belonging to TcVI. Now, Berenice represents a fundamental resource since it becomes the  
160 best-quality assembly available for a member of TcII (Table 2), contributing to expand the known  
161 genetic diversity of *T. cruzi* and facilitating the production of more comprehensive evolutionary  
162 inferences. It was almost two decades ago when the presence of three major groups of *T. cruzi* strains  
163 was described for the first time (Robello et al., 2000). Indeed, TcI, TcII and TcIII are homozygous  
164 lineages, being TcII and TcIII proposed as the putative parents for the remaining hybrid lineages TcV  
165 and TcVI (de Freitas et al. 2006; Zingales et al. 2012). Concordantly, our phylogenetic analysis places  
166 Berenice close to TCC and CLBrener Esmeraldo-like, both from TcVI lineage.

167 Here, we used a combination of Illumina and Oxford Nanopore reads to provide the most  
168 complete genome assembly of a TcII *T. cruzi* strain and is the first report of Nanopore reads used for  
169 trypanosomatids. We compared the assembly continuity and completeness obtained with the most  
170 simple library preparation kit of Nanopore with the assembly obtained only using Illumina reads and  
171 we obtained a highly improved assembly, similar to the ones obtained using PacBio reads. Even though  
172 the coverage and libraries preparation can be optimized, we demonstrate that Oxford Nanopore can be  
173 a very valuable technology to improve highly repetitive genomes such as trypanosomatids. This  
174 approach has several advantages and can be carried out in every laboratory without any previous  
175 training in sequencing, contributing to facilitate the enlargement of genomic resources for protozoan  
176 pathogens.

146  
147  
148  
149  
150  
151  
152  
153  
154  
155  
156  
157  
158  
159  
160  
161  
162  
163  
164  
165  
166  
167  
168  
169  
170  
171  
172  
173  
174  
175  
176  
177  
178

179

## 180 **Methods**

181

182 **Library preparation, genome sequencing and assembly.** Genomic libraries were prepared with the  
183 Nextera® XT Library Prep Kit (Illumina, 15032354) and Rapid Sequencing Kit (Nanopore, SQK-  
184 RAD004). Illumina and Nanopore libraries were sequenced in MiSeq and MinION platforms,  
185 producing 12,589,973 paired-end short reads and 265,221 long reads, respectively. Integrity of Illumina  
186 libraries were analyzed using 2100 Bioanalyzer (Agilent) and quantified using Qubit™ dsDNA HS  
187 Assay Kit. Berenice genome assembly was performed using Illumina reads (Illumina genome  
188 assembly) and mixing Illumina and Nanopore reads (Hybrid genome assembly) with MaSuRCA using  
189 default parameters (Zimin et al. 2013, 2017).

190

191 **Comparison of genome assemblies.** For genome assembly comparisons, Illumina and Nanopore reads  
192 were aligned to Berenice genome assembled with both reads using minimap2 v2.10-r784 (Li 2018)  
193 with default parameters. Per-base genome coverage was calculated using bedtools v2.26.0 (Quinlan and  
194 Hall 2010) and samplot (Belyeu et al. 2018) was used for rendering the sequencing coverage in specific  
195 genomic regions. Completeness of genome coding regions was assessed using BUSCO v3.0.2 (Simão  
196 et al. 2015) with the eukaryotic and protist lineages databases.

197

198 **Genome annotation.** In order to annotate the coding sequences, the annotated proteins of 41 protozoan  
199 parasites genomes were obtained from TriTrypDB release 38 (<http://tritrypdb.org/>). Otherwise, all open  
200 reading frames longer than 150 amino acids were retrieved between start and stop codon using getorf  
201 from the EMBOSS suite (Rice et al. 2000) in both assemblies. Homologous genes were recovered  
202 using BLAST+ blastp (Camacho et al. 2009), with alignment coverage >80%, identity percentage >  
203 80% and an e-value threshold of 1e-10. Rfam release 13 (Nawrocki et al. 2015) and Infernal v1.1.1  
204 (Nawrocki and Eddy 2013) were used for the annotation of non-coding genes as it was previously  
205 described (Kalvari et al. 2018). For tRNAs, tRNAscan-SE v.1.3.1 (Lowe and Chan 2016) was used  
206 with the euakaryotic model. Transposable elements were annotated using BLAST+ blastn (Camacho et  
207 al. 2009) and tandem repeats were annotated using Tandem Repeat Finder v4.09 (Benson 1999).

208

209 **Phylogenetic analysis.** Complete nucleotide sequences of L1Tc transposable elements were used to  
210 perform phylogenetic analyses. Sequences retrieved from six genomes were aligned using MAFFT  
211 v7.310 (Katoh and Standley 2013) with the L-ins-i option. A Maximum-Likelihood phylogenetic tree

212 was reconstructed using PhyML v20120412 (Guindon et al. 2010) using the best-fitted model GTR  
213 selected with ModelGenerator v0.85 (Benson 1999).

## 215 **Data Access**

216  
217 Sequencing data generated in this work has been deposited at the NCBI repository under the BioProject  
218 accession PRJNA498808.

## 220 **Acknowledgments**

221  
222 This work was funded by Agencia Nacional de Investigación e Innovación (ANII) DCI-  
223 ALA/2011/023–502, ‘Contrato de apoyo a las políticas de innovación y cohesión territorial’, Fondo  
224 para la Convergencia Estructural del Mercado Común del Sur (FOCEM) 03/11, and by Research  
225 Council United Kingdom Grand Challenges Research Funder ‘A Global Network for Neglected  
226 Tropical Diseases’ grant number MR/P027989/1. SP, GI, GG and CR are members of the “Sistema  
227 Nacional de Investigadores (ANII)””; FDV has an ANII doctoral fellowship No.  
228 POS\_NAC\_2016\_1\_129916.

## 230 **Author contributions**

231  
232 CR and GI conceived the idea. RCM processed and prepared samples. FDV and GG prepared libraries  
233 and performed Illumina and Nanopore sequencing. FDV, GI, and SP analyzed the data. FDV, GI and  
234 CR wrote the manuscript. All authors approved the final version of the manuscript.

## 236 **Disclosure declaration**

237  
238 The authors declared they have no conflicts of interest.

239



## References

- Belyeu JR, Nicholas TJ, Pedersen BS, Sasani TA, Havrilla JM, Kravitz SN, Conway ME, Lohman BK, Quinlan AR, Layer RM. 2018. SV-plaudit: A cloud-based framework for manually curating thousands of structural variants. *Gigascience* **7**.
- Benson G. 1999. Tandem repeats finder: a program to analyze DNA sequences. *Nucleic Acids Research* **27**: 573–580.
- Berná L, Rodriguez M, Chiribao ML, Parodi-Talice A, Pita S, Rijo G, Alvarez-Valin F, Robello C. 2018. Expanding an expanded genome: long-read sequencing of *Trypanosoma cruzi*. *Microb Genom* **4**.
- Callejas-Hernández F, Rastrojo A, Poveda C, Gironès N, Fresno M. 2018. Genomic assemblies of newly sequenced *Trypanosoma cruzi* strains reveal new genomic expansion and greater complexity. *Scientific Reports* **8**: 14631.
- Camacho C, Coulouris G, Avagyan V, Ma N, Papadopoulos J, Bealer K, Madden TL. 2009. BLAST+: architecture and applications. *BMC Bioinformatics* **10**: 421.
- Chagas C. 1909. Nova tripanozomíaze humana: estudos sobre a morfologia e o ciclo evolutivo do *Schizotrypanum cruzi* n. gen., n. sp., agente etiológico de nova entidade morbida do homem. *Memórias do Instituto Oswaldo Cruz* **1**: 159–218.
- de Freitas JM, Augusto-Pinto L, Pimenta JR, Bastos-Rodrigues L, Gonçalves VF, Teixeira SMR, Chiari E, Junqueira ÂCV, Fernandes O, Macedo AM, et al. 2006. Ancestral genomes, sex, and the population structure of *Trypanosoma cruzi*. *PLoS Pathogens* **2**: e24.
- de Lana M, Chiari CA, Chiari E, Morel CM, Gonçalves AM, Romanha ÁJ. 1996. Characterization of two isolates of *Trypanosoma cruzi* obtained from the patient Berenice, the first human case of Chagas' disease described by Carlos Chagas in 1909. *Parasitology Research* **82**: 257–260.
- Deane LM. 1964. Animal reservoirs of *Trypanosoma cruzi* in Brazil. *Revista Brasileira de Malariologia e Doenças Tropicais* **16**.
- El-Sayed NM, Myler PJ, Bartholomeu DC, Nilsson D, Aggarwal G, Tran A-N, Ghedin E, Worthey EA, Delcher AL, Blandin G, et al. 2005a. The Genome Sequence of *Trypanosoma cruzi*, Etiologic Agent of Chagas Disease. *Science* **309**: 409–415.
- 241 El-Sayed NM, Myler PJ, Blandin G, Berriman M, Crabtree J, Aggarwal G, Caler E, Renauld H,  
242 Worthey EA, Hertz-Fowler C, et al. 2005b. Comparative genomics of trypanosomatid parasitic  
243 protozoa. *Science* **309**:404-409
- 244
- 245
- Guindon S, Dufayard J-F, Lefort V, Anisimova M, Hordijk W, Gascuel O. 2010. New algorithms and methods to estimate Maximum-Likelihood phylogenies: assessing the performance of PhyML 3.0. *Systematic Biology* **59**: 307–321.
- Kalvari I, Nawrocki EP, Argasinska J, Quinones-Olvera N, Finn RD, Bateman A, Petrov AI. 2018. Non-coding RNA analysis using the Rfam database. *Current Protocols in Bioinformatics* **62**: e51.

- Katoh K, Standley DM. 2013. MAFFT Multiple Sequence Alignment Software Version 7: Improvements in Performance and Usability. *Mol Biol Evol* **30**: 772–780.
- Li H. 2018. Minimap2: pairwise alignment for nucleotide sequences. *Bioinformatics* **34**: 3094–3100.
- Lowe TM, Chan PP. 2016. tRNAscan-SE On-line: integrating search and context for analysis of transfer RNA genes. *Nucleic Acids Research* **44**: W54–W57.
- Nawrocki EP, Burge SW, Bateman A, Daub J, Eberhardt RY, Eddy SR, Floden EW, Gardner PP, Jones TA, Tate J, et al. 2015. Rfam 12.0: updates to the RNA families database. *Nucleic Acids Research* **43**: D130–D137.
- Nawrocki EP, Eddy SR. 2013. Infernal 1.1: 100-fold faster RNA homology searches. *Bioinformatics* **29**: 2933–2935.
- Pita S, Díaz-Viraqué F, Iraola G, Robello C. 2018. The Tritryps comparative repeatome: insights on repetitive element evolution in Trypanosomatid pathogens. *bioRxiv* 387217.
- Quinlan AR, Hall IM. 2010. BEDTools: a flexible suite of utilities for comparing genomic features. *Bioinformatics* **26**: 841–842.
- Robello C, Gamarro F, Castanys S, Alvarez-Valin F. 2000. Evolutionary relationships in *Trypanosoma cruzi*: molecular phylogenetics supports the existence of a new major lineage of strains. *Gene* **246**: 331–338.
- Rassi A, Rassi A, Marin-Neto JA. 2010. Chagas disease. *The Lancet* **375**: 1388–1402.
- Rice P, Longden I, Bleasby A. 2000. EMBOSS: The European Molecular Biology Open Software Suite. *Trends in Genetics* **16**: 276–277.
- Salgado JA, Garcez PN, de Oliveira CA, Galizzi J . 1962. Revisão clínica atual do primeiro caso humano descrito da doença de Chagas. *Rev Inst Med Trop São Paulo* **4**: 330–337
- Simão FA, Waterhouse RM, Ioannidis P, Kriventseva EV, Zdobnov EM. 2015. BUSCO: assessing genome assembly and annotation completeness with single-copy orthologs. *Bioinformatics* **31**: 3210–3212.
- Tan MH, Austin CM, Hammer MP, Lee YP, Croft LJ, Gan HM. 2018. Finding Nemo: hybrid assembly with Oxford Nanopore and Illumina reads greatly improves the clownfish (*Amphiprion ocellaris*) genome assembly. *Gigascience* **7**.
- WHO (2017). Chagas Disease (American Trypanosomiasis).  
<http://www.who.int/mediacentre/factsheets/fs340/en/>
- Wick RR, Judd LM, Gorrie CL, Holt KE. 2017. Completing bacterial genome assemblies with multiplex MinION sequencing. *Microbial Genomics* **3**.
- Zimin AV, Marçais G, Puiu D, Roberts M, Salzberg SL, Yorke JA. 2013. The MaSuRCA genome assembler. *Bioinformatics* **29**: 2669–2677.

Zimin AV, Puiu D, Luo M-C, Zhu T, Koren S, Marçais G, Yorke JA, Dvořák J, Salzberg SL. 2017. Hybrid assembly of the large and highly repetitive genome of *Aegilops tauschii*, a progenitor of bread wheat, with the MaSuRCA mega-reads algorithm. *Genome Research* **27**: 787–792.

Zingales B, Andrade SG, Briones MRS, Campbell DA, Chiari E, Fernandes O, Guhl F, Lages-Silva E, Macedo AM, Machado CR, et al. 2009. A new consensus for *Trypanosoma cruzi* intraspecific nomenclature: second revision meeting recommends TcI to TcVI. *Memórias do Instituto Oswaldo Cruz* **104**: 1051–1054.

Zingales B, Miles MA, Campbell DA, Tibayrenc M, Macedo AM, Teixeira MMG, Schijman AG, Llewellyn MS, Lages-Silva E, Machado CR, et al. 2012. The revised *Trypanosoma cruzi* subspecific nomenclature: Rationale, epidemiological relevance and research applications. *Infection, Genetics and Evolution* **12**: 240–253.

246

247

248

249

250

251

252

253

254

255

256

257

258

259

260

261

262

263

264

265

266

267

268

269

270

## Figures

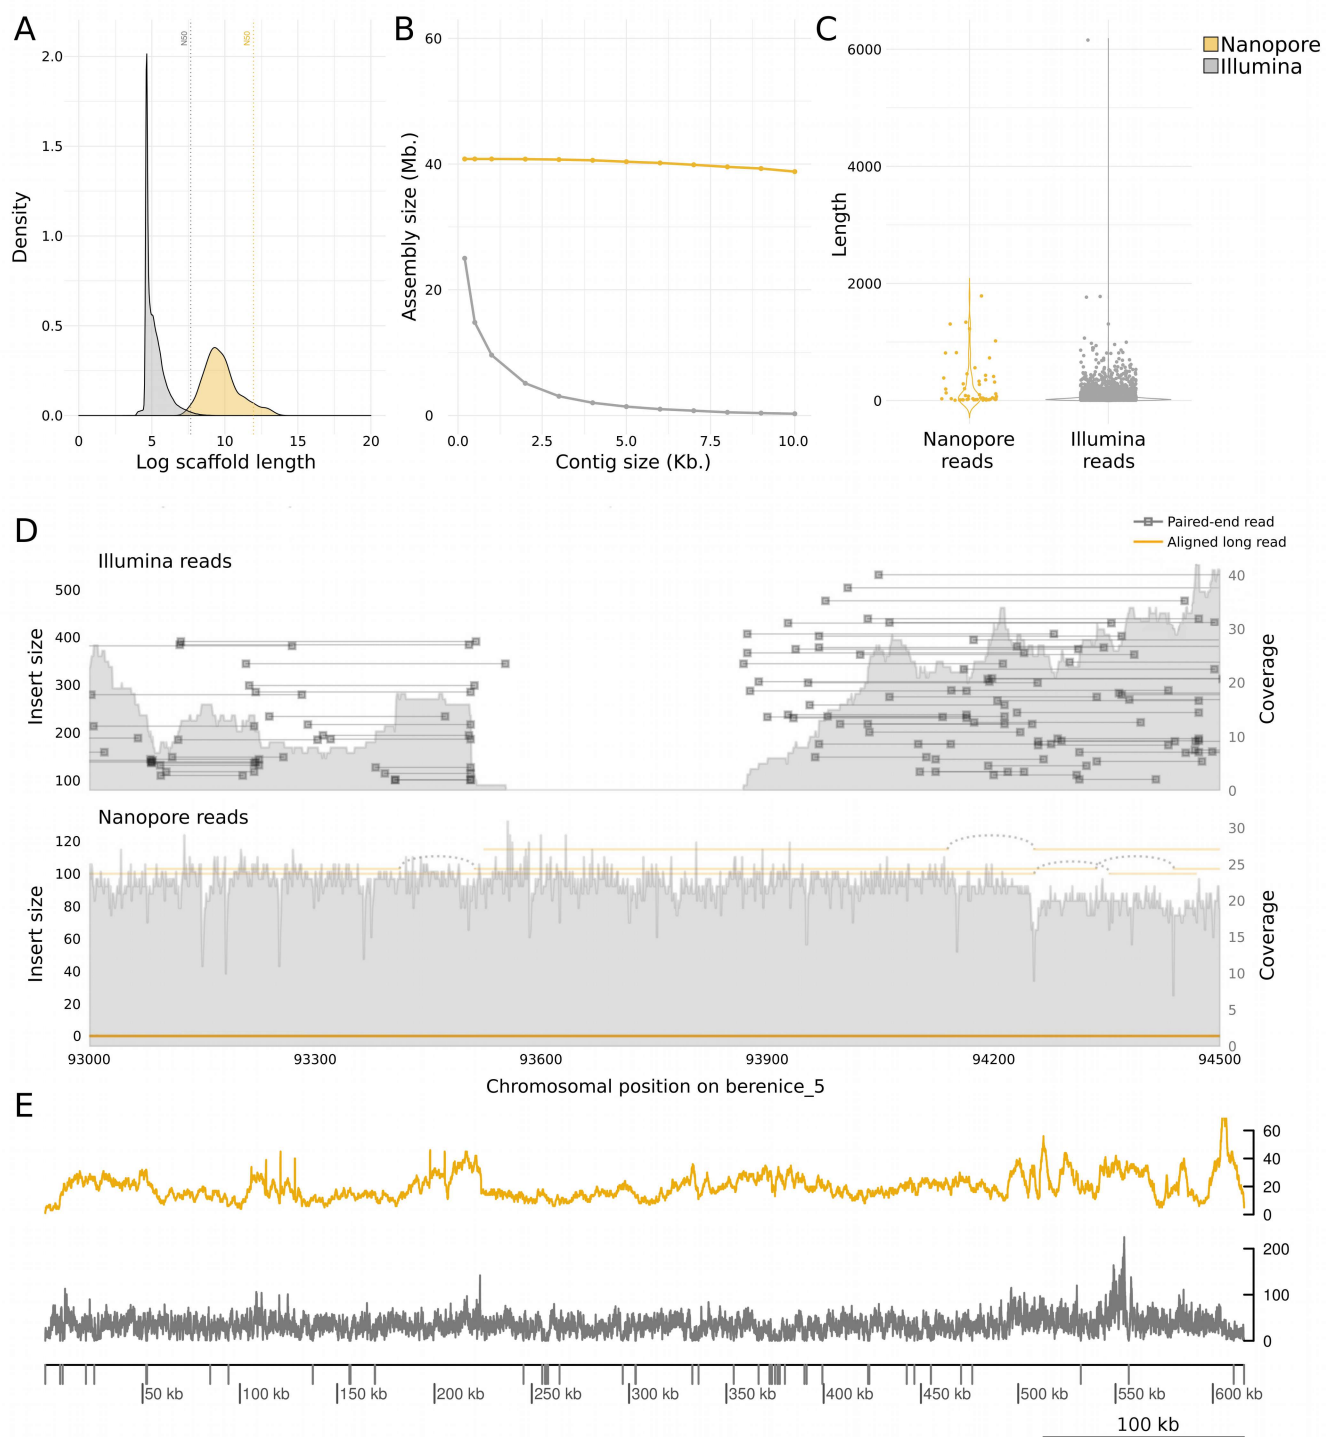

272

273

274 **Figure 1. Nanopore sequencing improves *T. cruzi* assembly contiguity and size.** A) Scaffolds length  
275 distribution. N50 of the hybrid genome assembly: 156193. N50 of Illumina assembly: 2127. B)  
276 Cumulative assemblies size. C) Coverage zero regions (no read alignment in at least 6 consecutive  
277 positions) observed when Nanopore or Illumina reads were aligned to the hybrid assembly in order to  
278 assess the contribution of both technologies to the assembly contiguity D) Sequencing coverage and  
279 insert size from 93 Kb to 94.5 Kb positions of scaffold berenice\_5 from hybrid assembly are plotted. E)  
280 Per-base genome coverage of scaffold 4 of hybrid assembly. Coverage zero regions are plotted as gray  
281 bars over the exe and all were observed when Illumina reads were aligned to hybrid assembly.

282  
283  
284  
285  
286  
287  
288  
289  
290  
291  
292  
293  
294  
295  
296  
297  
298  
299  
300  
301  
302  
303  
304  
305  
306

307  
308  
309  
310  
311  
312  
313  
314  
315  
316  
317  
318  
319  
320  
321  
322  
323  
324  
325  
326  
327  
328  
329  
330  
331  
332  
333  
334  
335  
336  
337  
338  
339

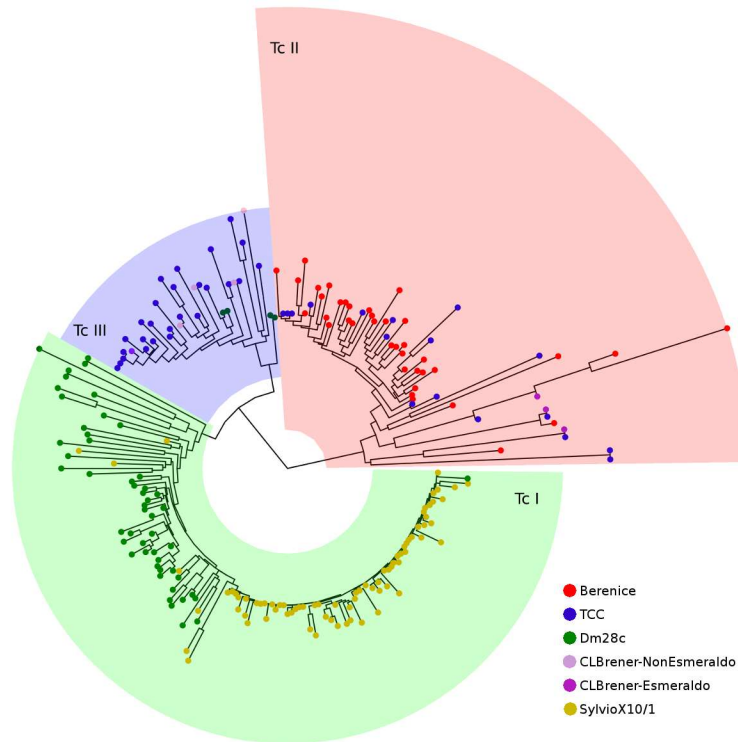

**Figure 2. Evolutionary relationships of *T. cruzi* strains.** Maximum-likelihood phylogeny constructed with full L1Tc sequences recovered from six *T. cruzi* genomes.

340 **Table 1.** Summary of genome assemblies and annotation.

|                                  | Hybrid genome assembly | Illumina genome assembly |
|----------------------------------|------------------------|--------------------------|
| <b>Assembly features</b>         |                        |                          |
| Number of contigs                | 923                    | 46,821                   |
| Largest contig                   | 926,516                | 26,836                   |
| Size (bp)                        | 40,801,262             | 25,004,252               |
| GC (%)                           | 51.20                  | 48.67                    |
| N50                              | 156,193                | 659                      |
| N75                              | 40,889                 | 333                      |
| Number of contigs (>= 50,000 pb) | 160                    | 0                        |
| <b>Annotation</b>                |                        |                          |
| Coding genes                     | 14,032                 | 4,282                    |
| Non-coding genes                 | 456                    | 107                      |
| tRNA                             | 58                     | 47                       |
| tRNA-Sec                         | 1                      | 0                        |
| 5S rRNA                          | 20                     | 1                        |
| 5.8S rRNA                        | 7                      | 1                        |
| SSU                              | 10                     | 3                        |
| LSU                              | 10                     | 7                        |
| snoRNA                           | 345                    | 46                       |
| snRNA                            | 5                      | 2                        |
| Transposable elements            | 388                    | 4                        |
| CZAR                             | 27                     | 0                        |
| L1Tc                             | 38                     | 0                        |
| VIPER                            | 50                     | 0                        |
| NARTc                            | 54                     | 4                        |
| SIRE                             | 80                     | 0                        |
| TcTREZO                          | 139                    | 0                        |
| <b>Completeness</b>              |                        |                          |
| Complete BUSCO eukaryote         | 206 (68 %)             | 147 (48.5 %)             |
| Fragmented BUSCO eukaryote       | 19 (6.3 %)             | 62 (20.5 %)              |
| Missing BUSCO eukaryote          | 78 (25.7 %)            | 94 (31 %)                |
| Complete BUSCO protis            | 121 (56.3 %)           | 61 (28.4 %)              |
| Fragmented BUSCO protis          | 1 (0.5 %)              | 1 (0.5 %)                |
| Missing BUSCO protis             | 93 (43.3 %)            | 153 (71.2 %)             |

343

**Table 2.** Comparison of the *T. cruzi* genomes assembled with long read.

|                 | <b>Sequencing method</b> | <b>Size (Mb)</b> | <b>GC (%)</b> | <b>Number of contigs</b> | <b>N50</b> | <b>Coverage</b>                | <b>BUSCO eukaryota</b> |
|-----------------|--------------------------|------------------|---------------|--------------------------|------------|--------------------------------|------------------------|
| Dm28c (TcI)     | PacBio                   | 53.16            | 51.6          | 599                      | 317,638    | 76 X                           | 202                    |
| Berenice (TcII) | Illumina<br>Nanopore     | 40.80            | 51.2          | 923                      | 156,193    | 41 X Illumina<br>28 X Nanopore | 206                    |
| Bug2148 (TcV)   | PacBio                   | 55.22            | 51.63         | 934                      | 196,760    | 68 X                           | 208                    |
| TCC (TcVI)      | PacBio                   | 86.77            | 51.7          | 1142                     | 265,169    | 60 X                           | 210                    |
